# Supplementary material for: Characterization of a fosA3 Carrying IncC–IncN Plasmid From a Multidrug-Resistant ST17 Salmonella Indiana Isolate
Source: Front Microbiol. 2020 Jul 21;11:1582. doi: 10.3389/fmicb.2020.01582 (PMC7385254; doi:10.3389/fmicb.2020.01582)
Supplement: Supplementary file 1 [file Data_Sheet_1.pdf]

## Supplementary materials

Table S1: Primers used for detected the circular intermediate in this study

| Target segment        | Primer     | Sequence (5' to 3')   | Reference  |
|-----------------------|------------|-----------------------|------------|
| Circular intermediate | FosA3-RC-F | TTCGGCAGGCGTCTGTTGTG  | This study |
|                       | FosA3-RC-R | TTCGACTACTTTATGCGCGAG | This study |

Table S2: Primers used for detect the presence of the three plasmids used in this study

| Target plasmid | Primer | Sequence (5' to 3')       | Reference  |
|----------------|--------|---------------------------|------------|
| pT-HNK130-1    | P1     | F: TCGTCAGTCCAGCGATATCCC  | This study |
|                |        | R: TAACCAGGAGCGCTTGAACCA  | This study |
| pT-HNK130-2    | P2     | F: AAACCGTGCTATCCGAAC     | This study |
|                |        | R: AAGCAAAATCCCGTCTGACA   | This study |
| pT-HNK130-3    | P3     | F: CCGCGAACATCATCCGTTG    | This study |
|                |        | R: AGGAAAGCGACTATACCCACTT | This study |

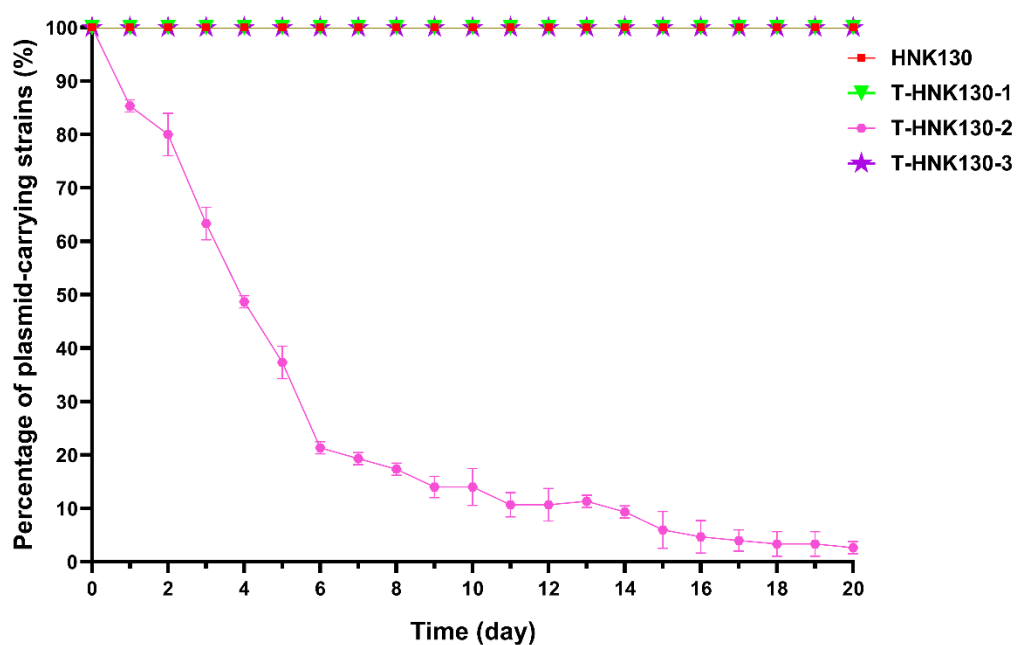

Figure S1. Measurement of plasmids stability in transformants in liquid media. Serial passaging in antibiotic-free LB broth was performed daily. All experiments were conducted in triplicate.

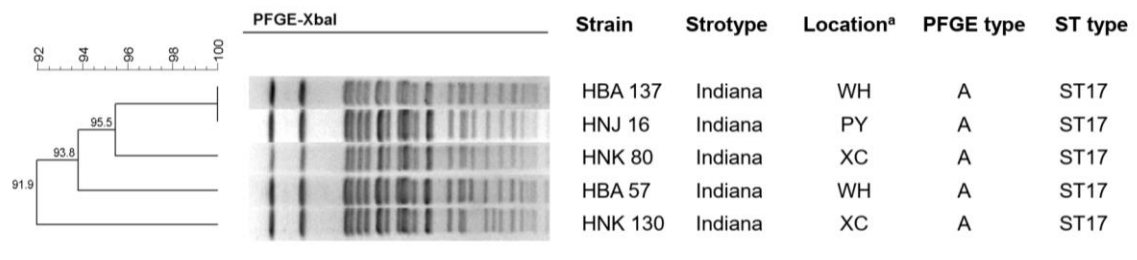

Figure S2. Pulsed-field gel electrophoresis finger printing patterns of Xba I-digested total DNA preparations from *Salmonella* isolates harboring *fosA3* genes. <sup>a</sup>Geographical locations are indicated as follows: PY, PuYang HeNan; XC, XuChang HeNan; WH, WuHan HuBei.

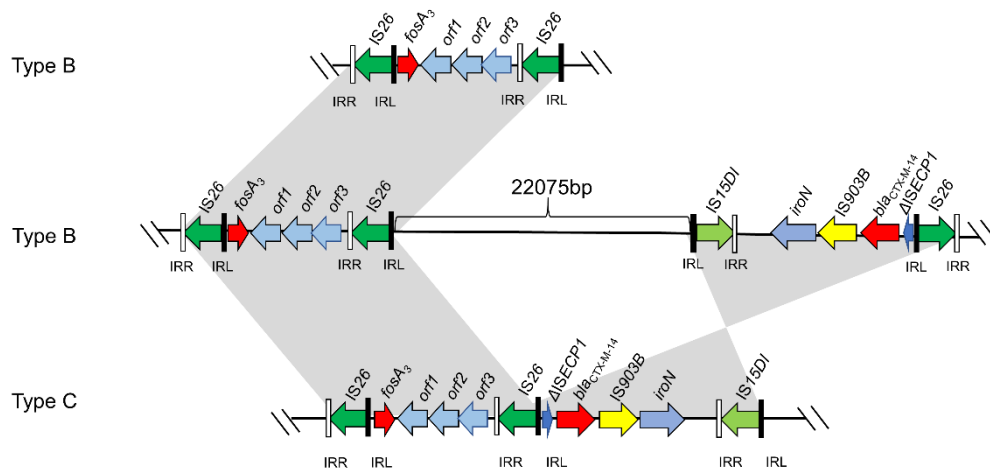

Figure S3. Three different genetic environments of *fosA3* in the plasmid in this study, regions of  $\geq 99.0\%$  nucleotide sequence identity are shaded gray.

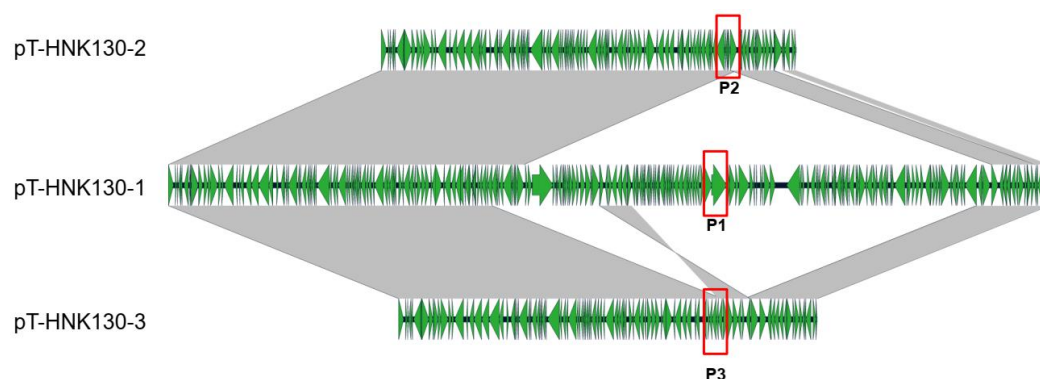

Figure S4. Amplified region for primers used to detect the presence of pT-HNK130-1, -2 and -3.
